# Supplementary material
Source: publisher figshare collection journal article supplement (https://frontiersin.figshare.com/ndownloader/files/24785729)
Supplement: Supplementary file 1 [file 24785729]

## Supplementary Materials

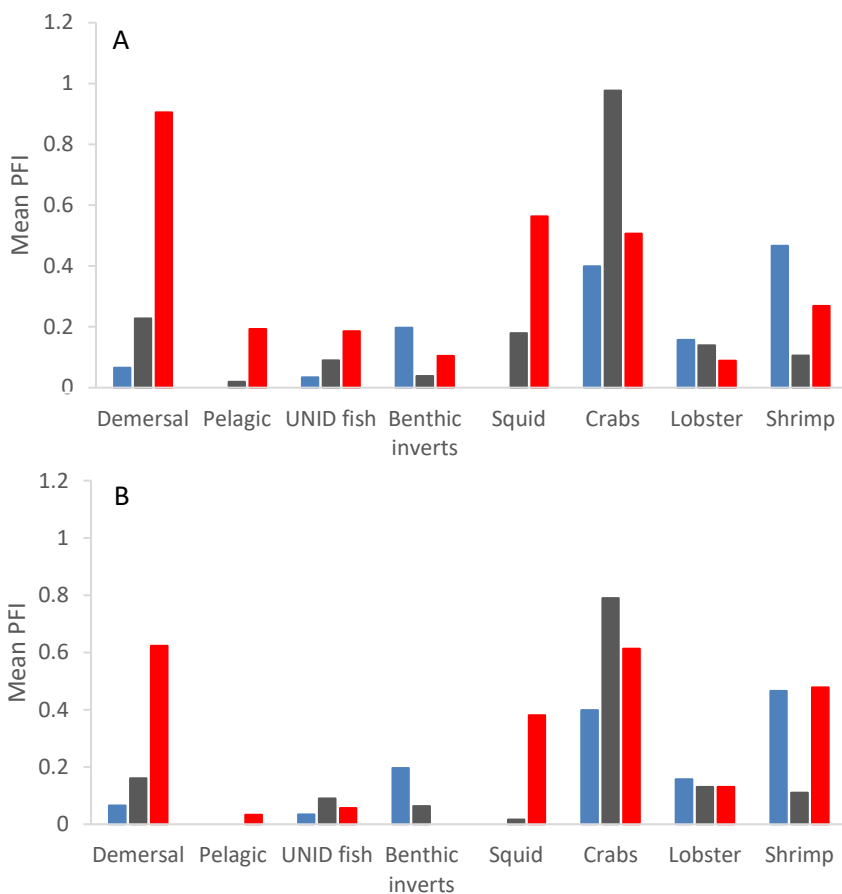

Supplementary Figure S1. Mean PFI of prey items in the diet of black sea bass collected in Maine (blue), northern Massachusetts (gray) and southern Massachusetts (red) for A) all capture methods combined, and B) trap caught fish only.

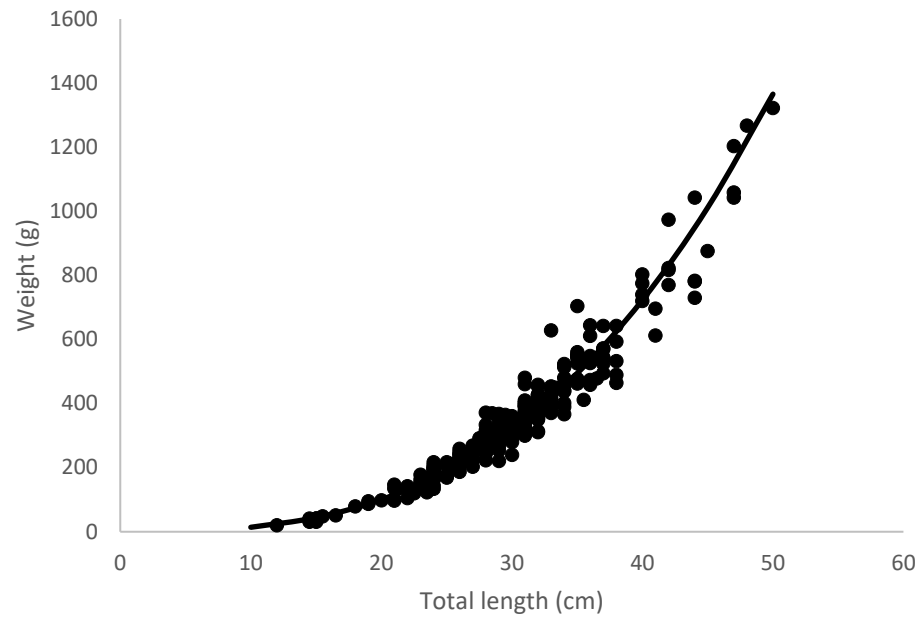

Supplementary Figure S2. Length-weight relationship for black sea bass from all regions combined.
